# Supplementary material for: Cytotoxic and Anti-Inflammatory Activities of Dihydroisocoumarin and Xanthone Derivatives from Garcinia picrorhiza
Source: MDPI journal article supplement (doi:10.3390/molecules26216626), 2021-11-01
Supplement: s1 [file s1]

## SUPPORTING INFORMATION

### **Cytotoxic and anti-inflammatory activities of dihydroisocoumarin and xanthone derivatives from *Garcinia picrorhiza***

Edwin R. Sukandar<sup>1</sup>, Sutin Kaennakam<sup>2</sup>, Pia Raab<sup>3</sup>, Xuehong Nöst<sup>3</sup>, Kitiya Rassamee<sup>4</sup>, Rudolf Bauer<sup>3</sup>, Pongpun Siripong<sup>4</sup>, Taslim Ersam<sup>5</sup>, Santi Tip-pyang<sup>1</sup>, and Warinthorn Chavasiri<sup>1,\*</sup>

<sup>1</sup>Center of Excellence in Natural Products Chemistry, Department of Chemistry, Faculty of Science, Chulalongkorn University, Bangkok 10330, Thailand

<sup>2</sup>Department of Agro-Industrial, Food, and Environmental Technology, Faculty of Applied Science, King Mongkut's University of Technology North Bangkok (KMUTNB), Bangkok 10800, Thailand

<sup>3</sup>Institute of Pharmaceutical Sciences, Section of Pharmacognosy, University of Graz, Beethovenstraße 8, 8010 Graz, Austria

<sup>4</sup>Natural Products Research Section, Research Division, National Cancer Institute, Bangkok 10400, Thailand

<sup>5</sup>Natural Products and Synthesis Chemistry Research Laboratory, Department of Chemistry, Faculty of Science and Data Analytics, Institut Teknologi Sepuluh Nopember, Kampus ITS-Sukolilo, Surabaya 60111, Indonesia

#### **\*Corresponding authors**

Assist. Prof. Dr. Warinthorn Chavasiri. Tel.: +662 218 762. E-mail address: warinthorn.c@chula.ac.th

## Table of Contents

|             |                                                                                            |
|-------------|--------------------------------------------------------------------------------------------|
| Figure S1.  | $^1\text{H}$ NMR spectrum of 2'-hydroxyannulatomarin ( <b>3</b> ) in acetone- $d_6$        |
| Figure S2.  | $^{13}\text{C}$ NMR spectrum of 2'-hydroxyannulatomarin ( <b>3</b> ) in acetone- $d_6$     |
| Figure S3.  | COSY spectrum of 2'-hydroxyannulatomarin ( <b>3</b> ) in acetone- $d_6$                    |
| Figure S4.  | HSQC spectrum of 2'-hydroxyannulatomarin ( <b>3</b> ) in acetone- $d_6$                    |
| Figure S5.  | HMBC spectrum of 2'-hydroxyannulatomarin ( <b>3</b> ) in acetone- $d_6$                    |
| Figure S6.  | HRESIMS spectrum of 2'-hydroxyannulatomarin ( <b>3</b> ) in MeOH                           |
| Figure S7.  | IR spectrum of 2'-hydroxyannulatomarin ( <b>3</b> )                                        |
| Figure S8.  | $^1\text{H}$ NMR spectrum of gerontoxanthone C hydrate ( <b>4</b> ) in acetone- $d_6$      |
| Figure S9.  | $^{13}\text{C}$ NMR spectrum of gerontoxanthone C hydrate ( <b>4</b> ) in acetone- $d_6$   |
| Figure S10. | COSY spectrum of gerontoxanthone C hydrate ( <b>4</b> ) in acetone- $d_6$                  |
| Figure S11. | HSQC spectrum of gerontoxanthone C hydrate ( <b>4</b> ) in acetone- $d_6$                  |
| Figure S12. | HMBC spectrum of gerontoxanthone C hydrate ( <b>4</b> ) in acetone- $d_6$                  |
| Figure S13. | HRESIMS spectrum of gerontoxanthone C hydrate ( <b>4</b> ) in MeOH                         |
| Figure S14. | $^1\text{H}$ NMR spectrum of 3'-hydroxycalothorexanthone ( <b>5</b> ) in acetone- $d_6$    |
| Figure S15. | $^{13}\text{C}$ NMR spectrum of 3'-hydroxycalothorexanthone ( <b>5</b> ) in acetone- $d_6$ |
| Figure S16. | COSY spectrum of 3'-hydroxycalothorexanthone ( <b>5</b> ) in acetone- $d_6$                |
| Figure S17. | HSQC spectrum of 3'-hydroxycalothorexanthone ( <b>5</b> ) in acetone- $d_6$                |
| Figure S18. | HMBC spectrum of 3'-hydroxycalothorexanthone ( <b>5</b> ) in acetone- $d_6$                |
| Figure S19. | HRESIMS spectrum of 3'-hydroxycalothorexanthone ( <b>5</b> ) in MeOH                       |
| Figure S20. | Experimental ECD spectra of <b>1–4</b> in MeOH                                             |

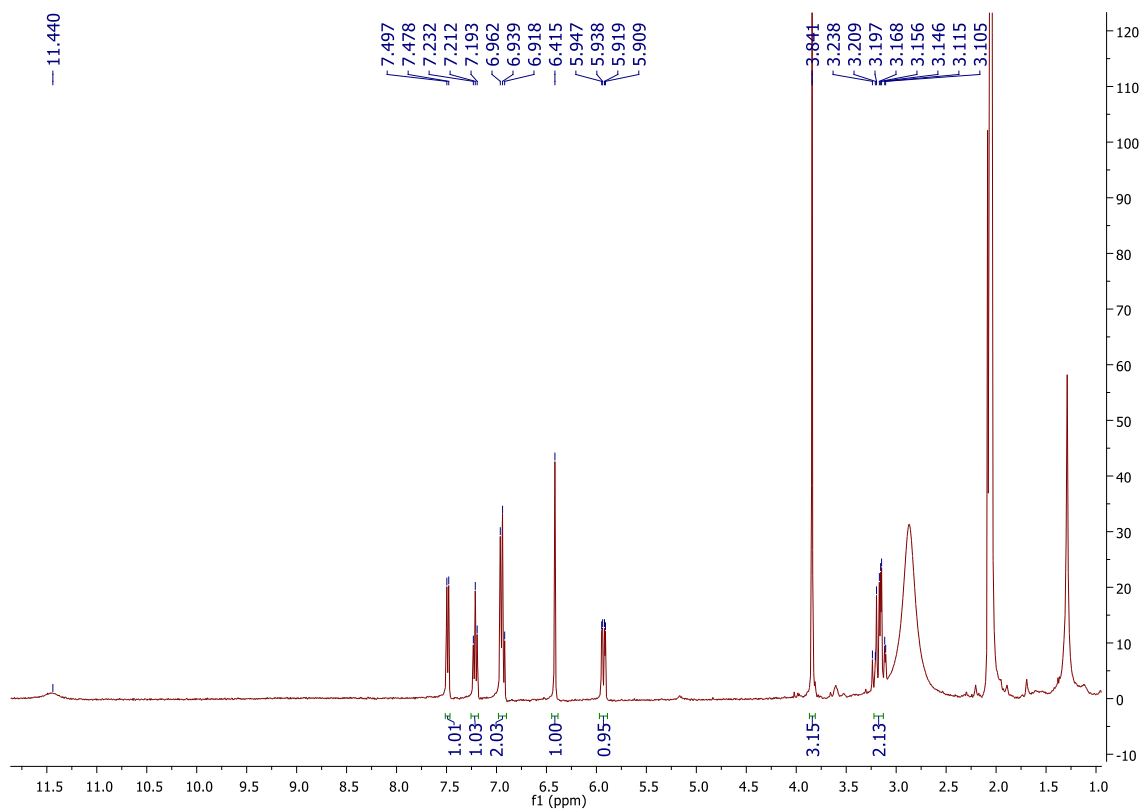

Figure S1.  $^1\text{H}$  NMR spectrum of 2'-hydroxyannulatamarin (**3**) in acetone- $d_6$

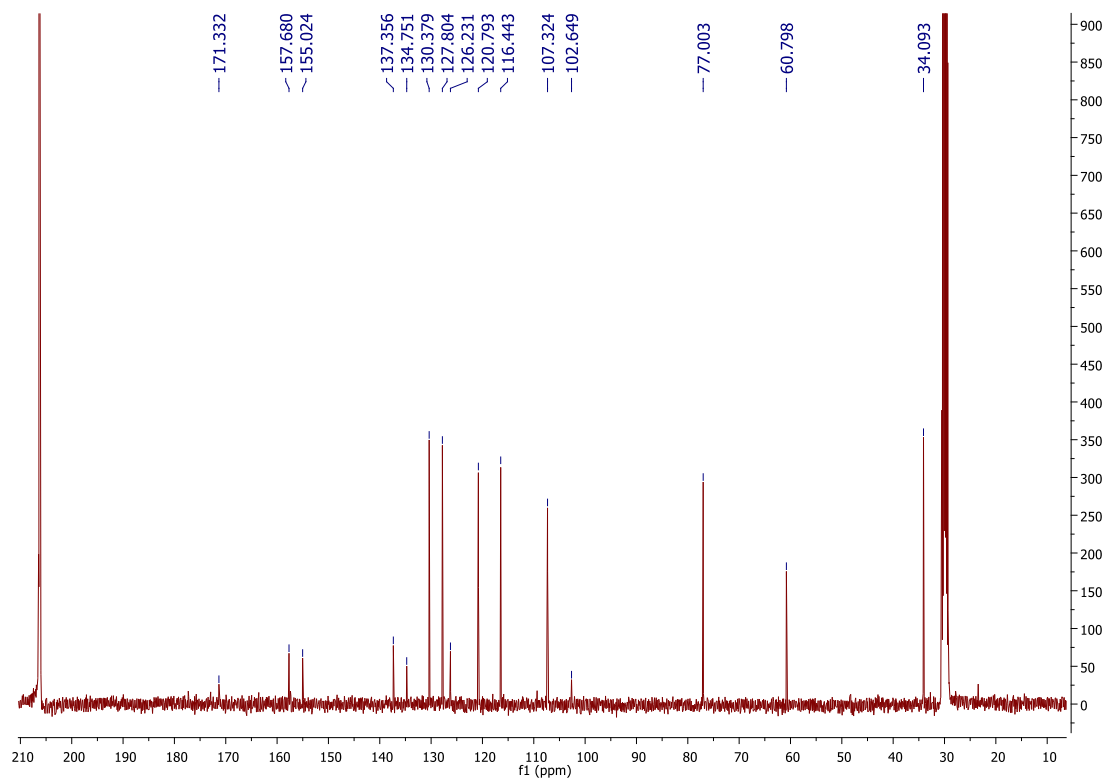

Figure S2.  $^{13}\text{C}$  NMR spectrum of 2'-hydroxyannulatamarin (**3**) in acetone- $d_6$

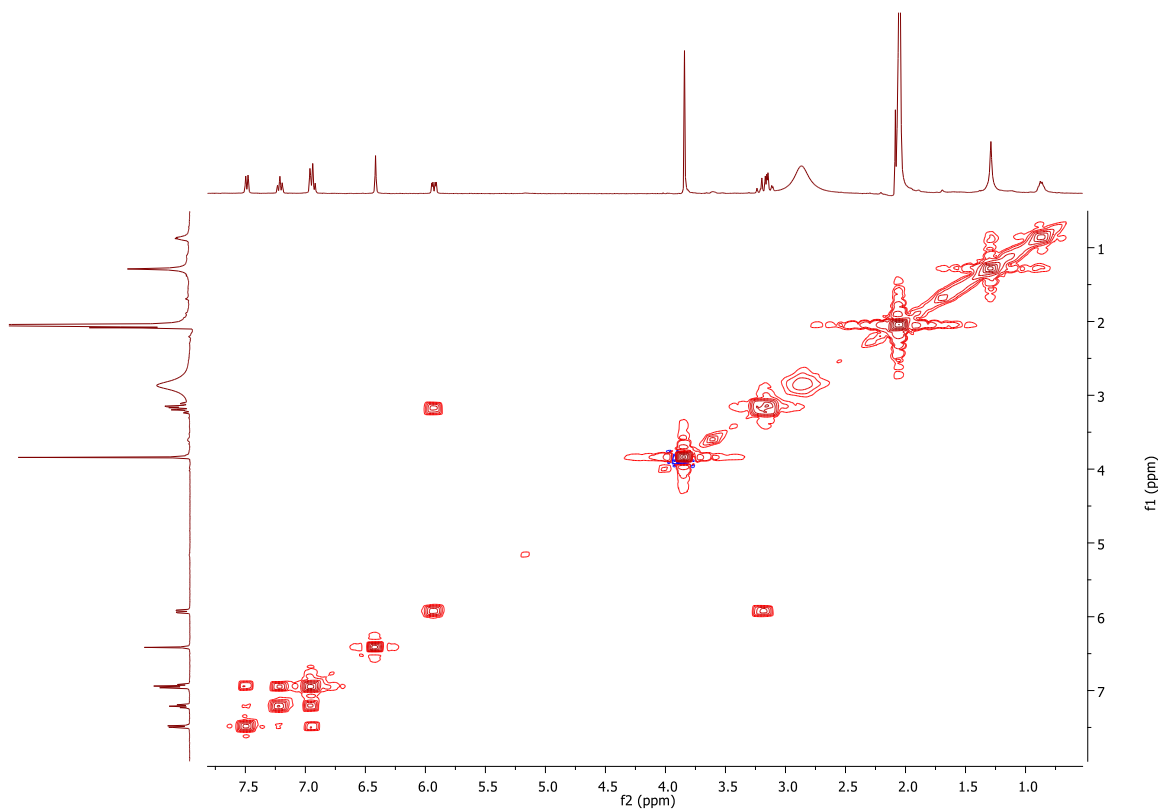

Figure S3. COSY spectrum of 2'-hydroxyannulatamarin (**3**) in acetone- $d_6$

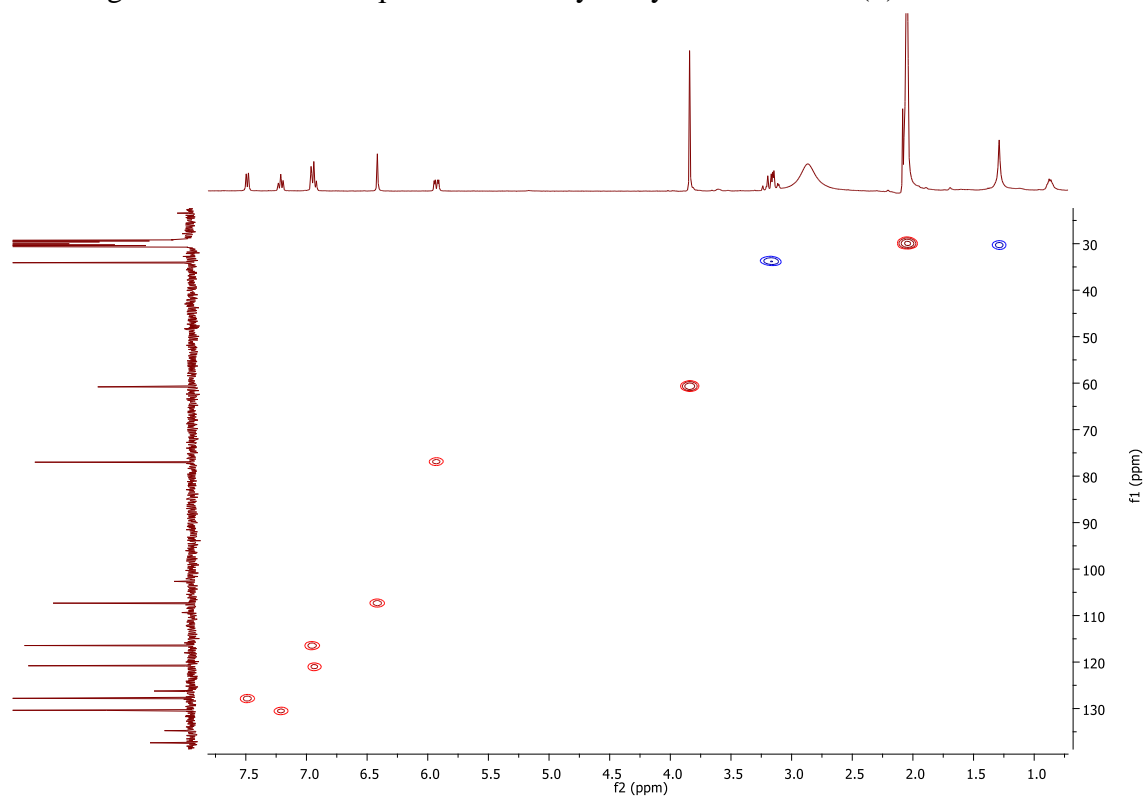

Figure S4. HSQC spectrum of 2'-hydroxyannulatamarin (**3**) in acetone- $d_6$

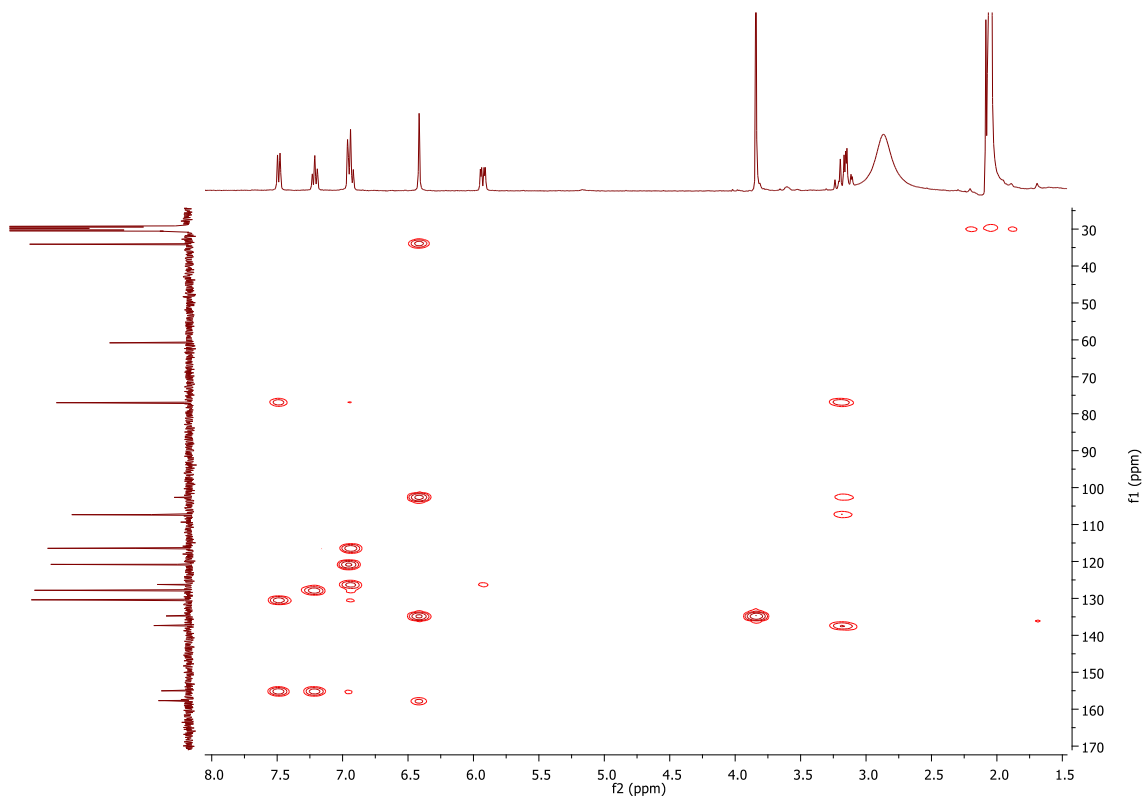

Figure S5. HMBC spectrum of 2'-hydroxyannulatamarin (**3**) in acetone- $d_6$

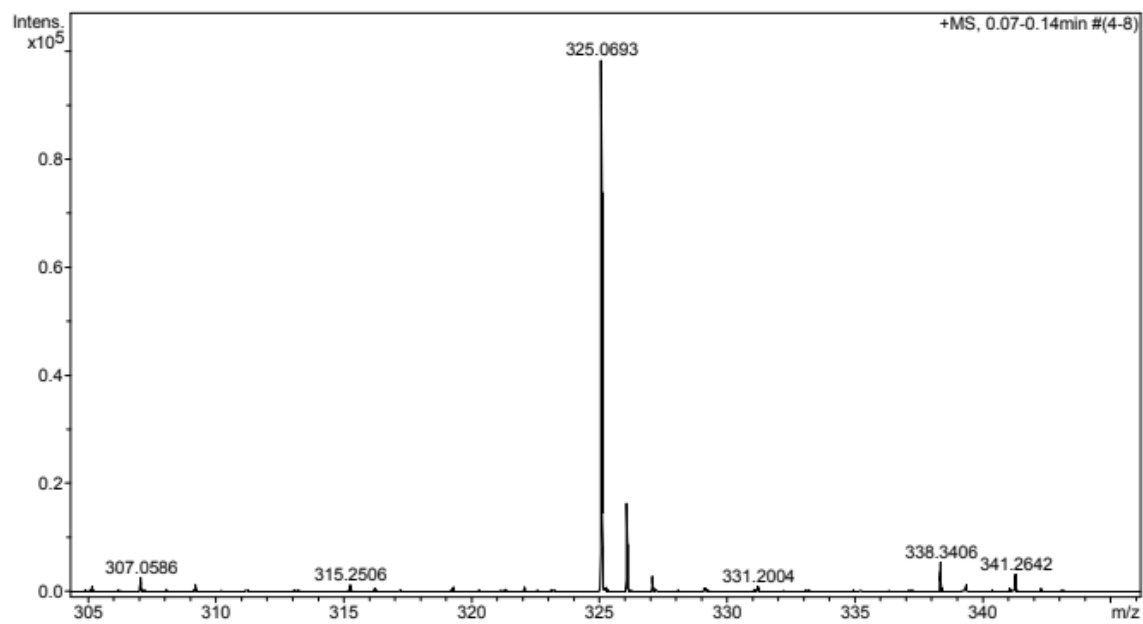

Figure S6. HRESIMS spectrum of 2'-hydroxyannulatamarin (**3**) in MeOH

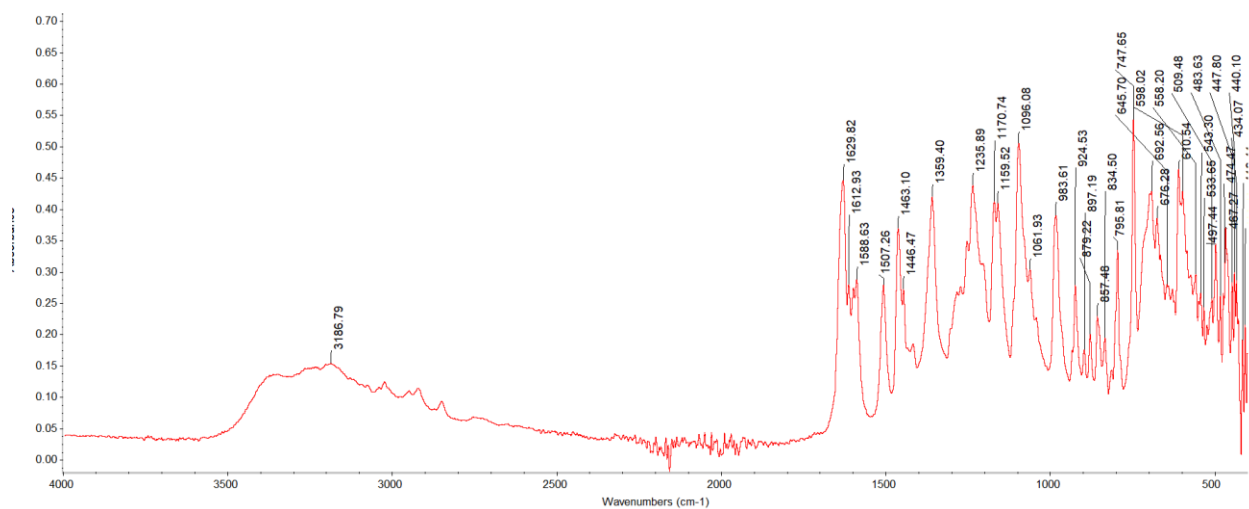

Figure S7. IR spectrum of 2'-hydroxyannulatomin (**3**)

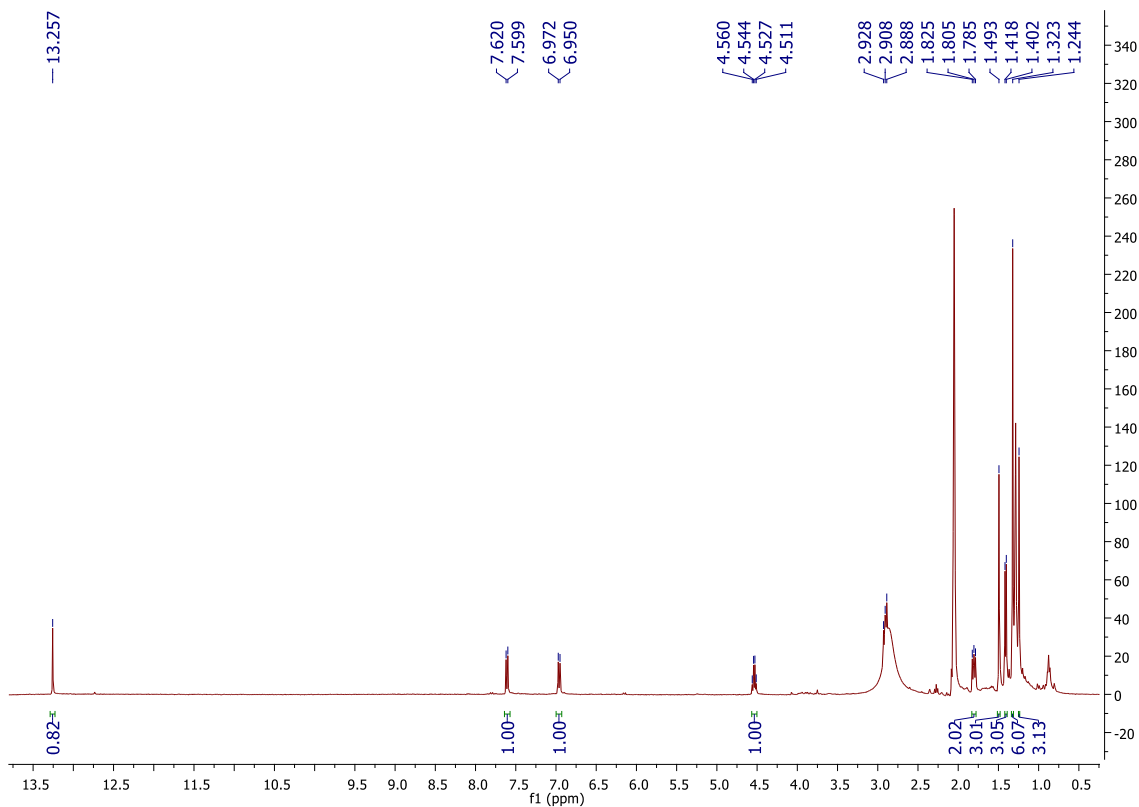

Figure S8. <sup>1</sup>H NMR spectrum of gerontoxanthone C hydrate (**4**) in acetone-*d*<sub>6</sub>

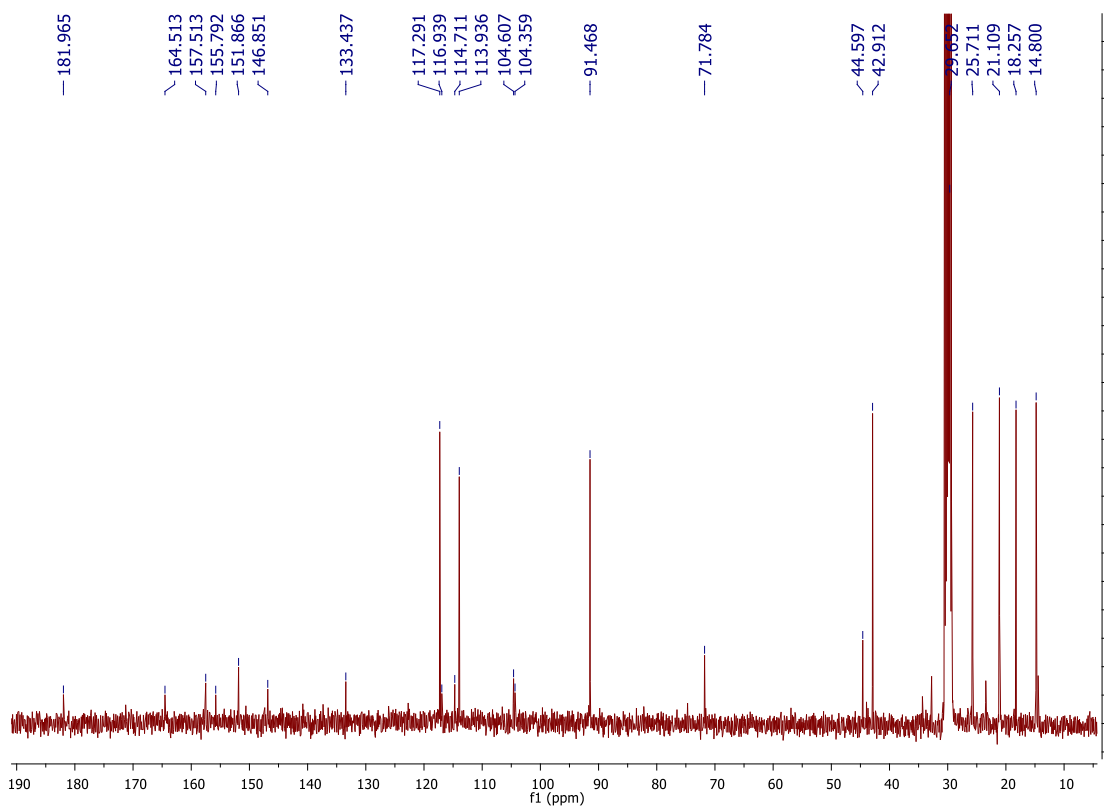

Figure S9. <sup>13</sup>C NMR spectrum of gerontoxanthone C hydrate (**4**) in acetone-*d*<sub>6</sub>

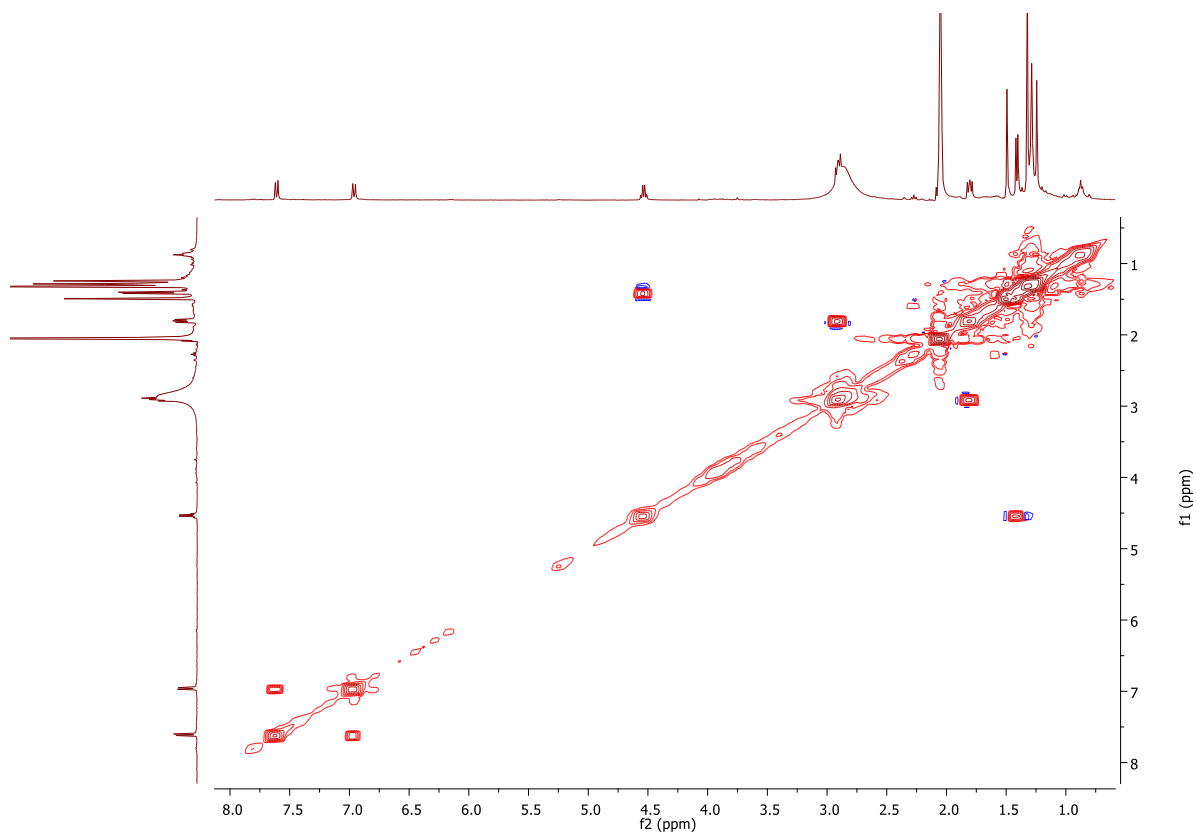

Figure S10. COSY spectrum of gerontoxanthone C hydrate (**4**) in acetone- $d_6$

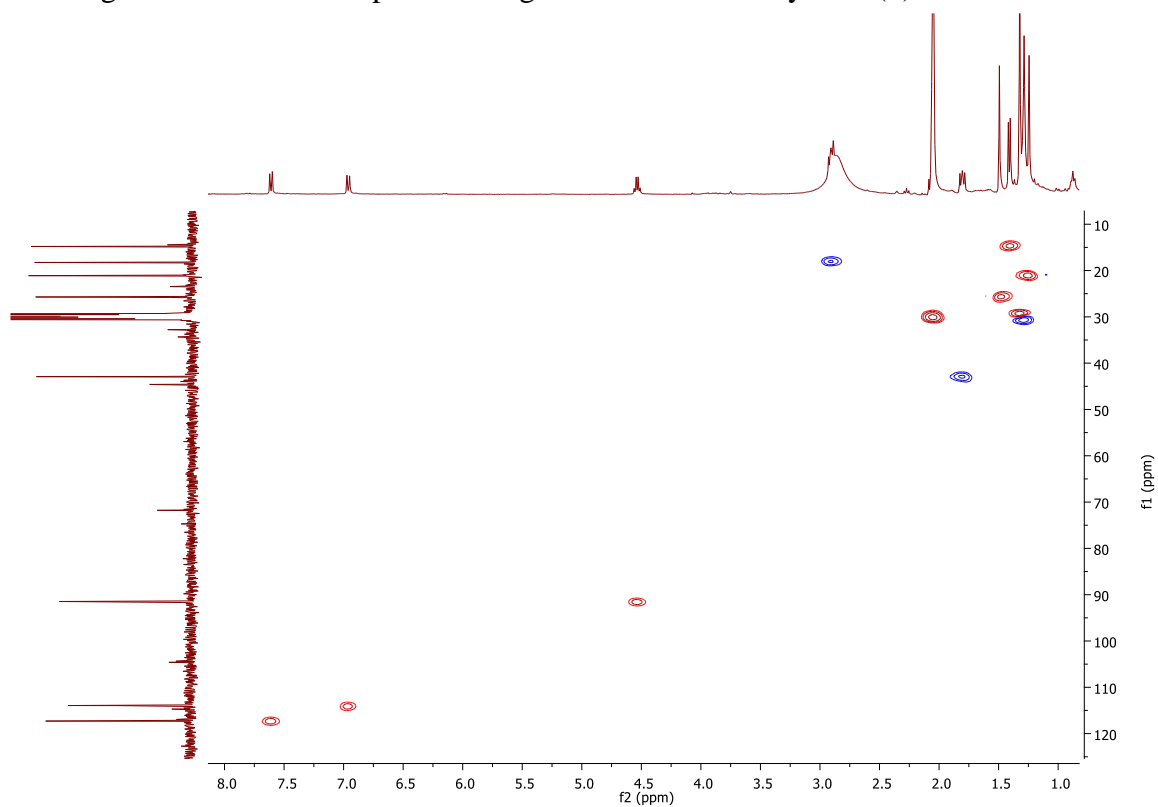

Figure S11. HSQC spectrum of gerontoxanthone C hydrate (**4**) in acetone- $d_6$



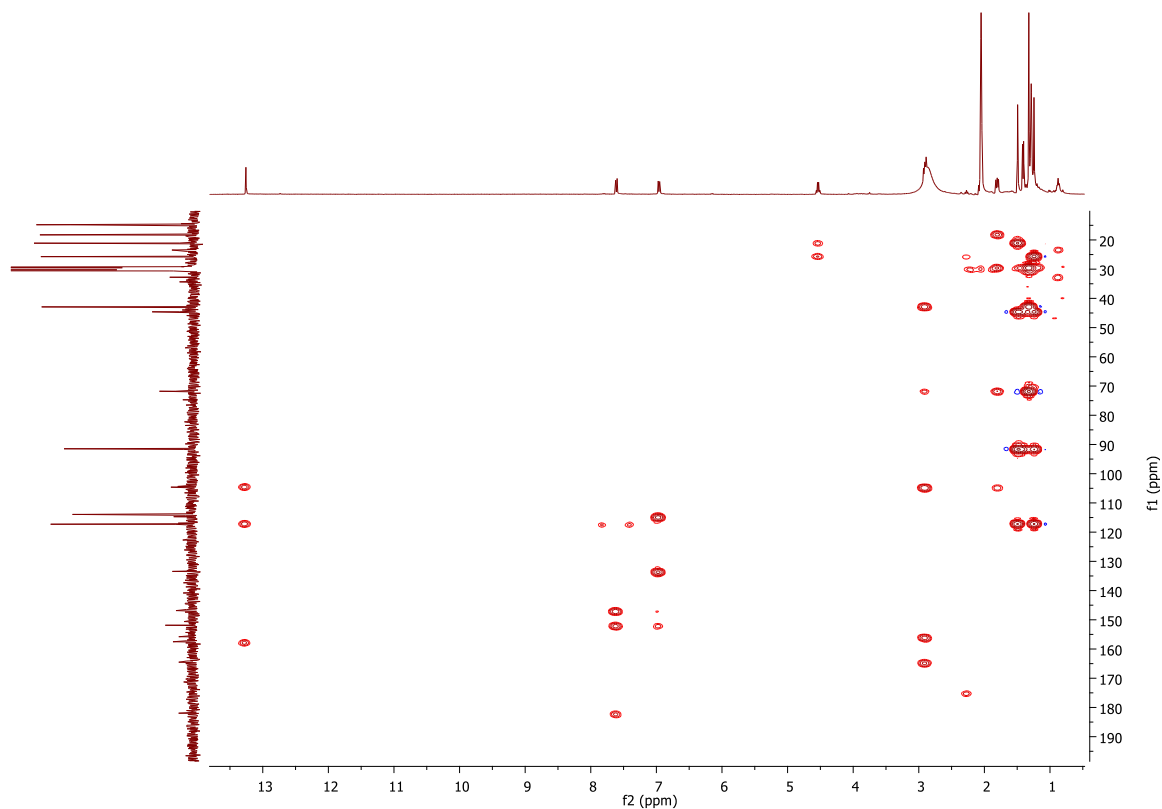

Figure S12. HMBC spectrum of gerontoxanthone C hydrate (**4**) in acetone- $d_6$

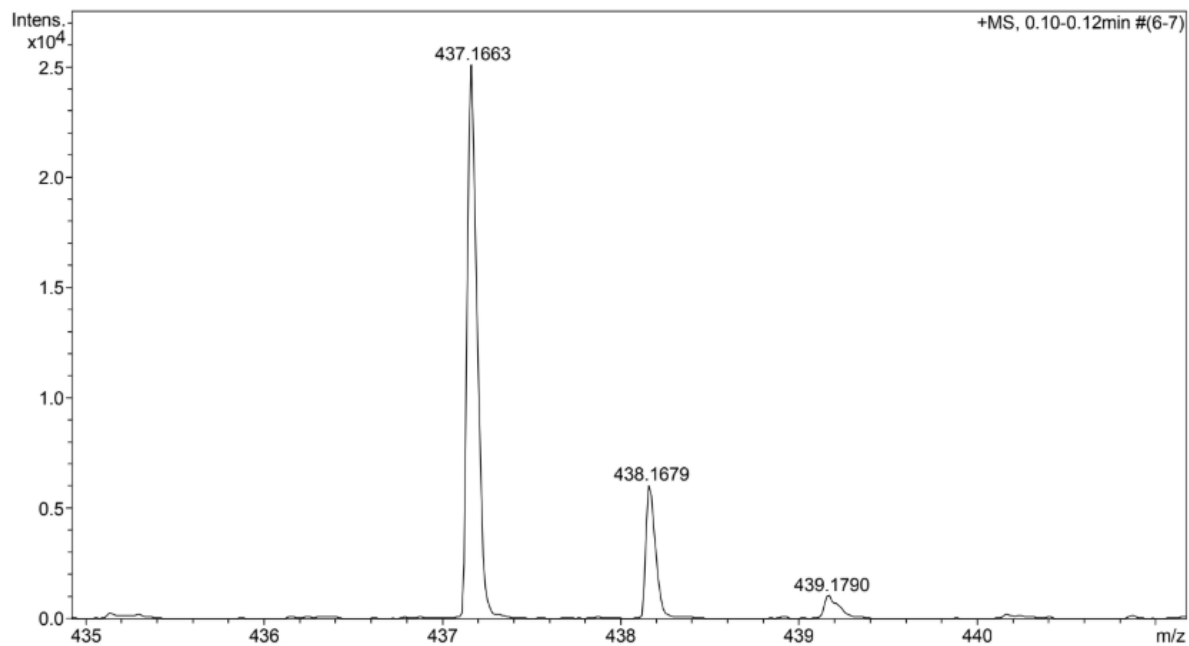

Figure S13. HRESIMS spectrum of gerontoxanthone C hydrate (**4**) in MeOH

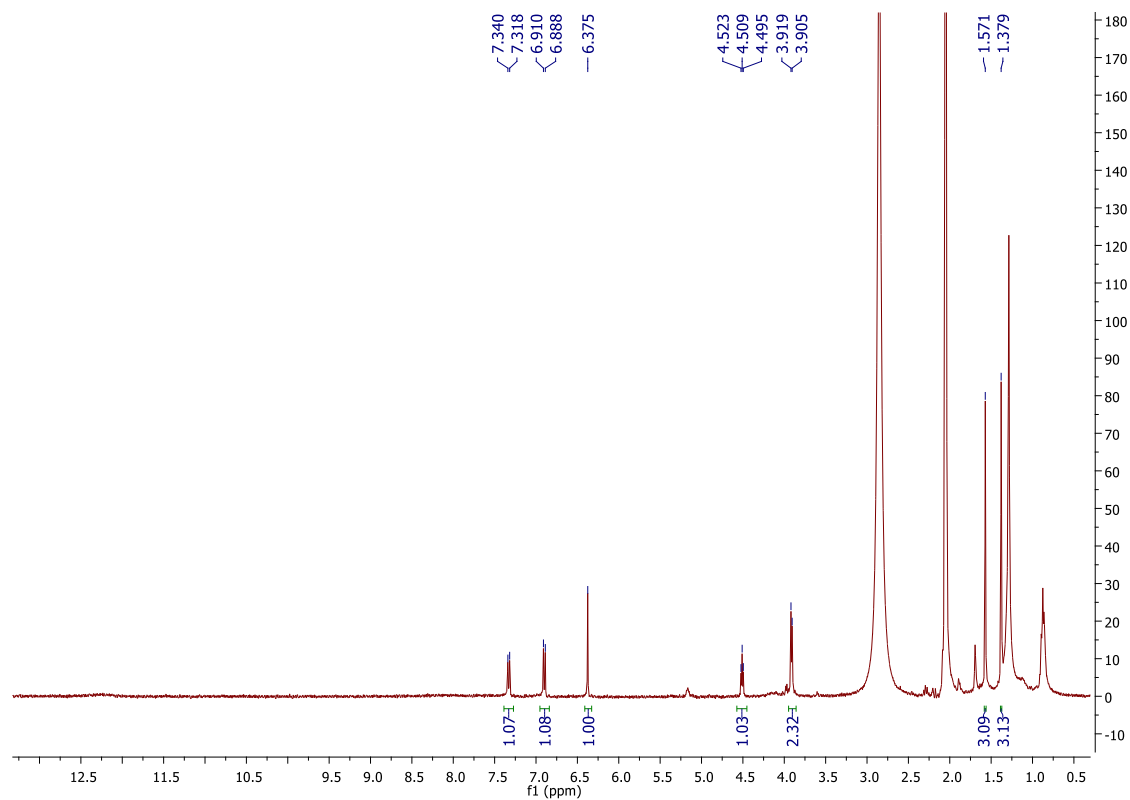

Figure S14. <sup>1</sup>H NMR spectrum of 3'-hydroxycalotherexanthone (**5**) in acetone-*d*<sub>6</sub>

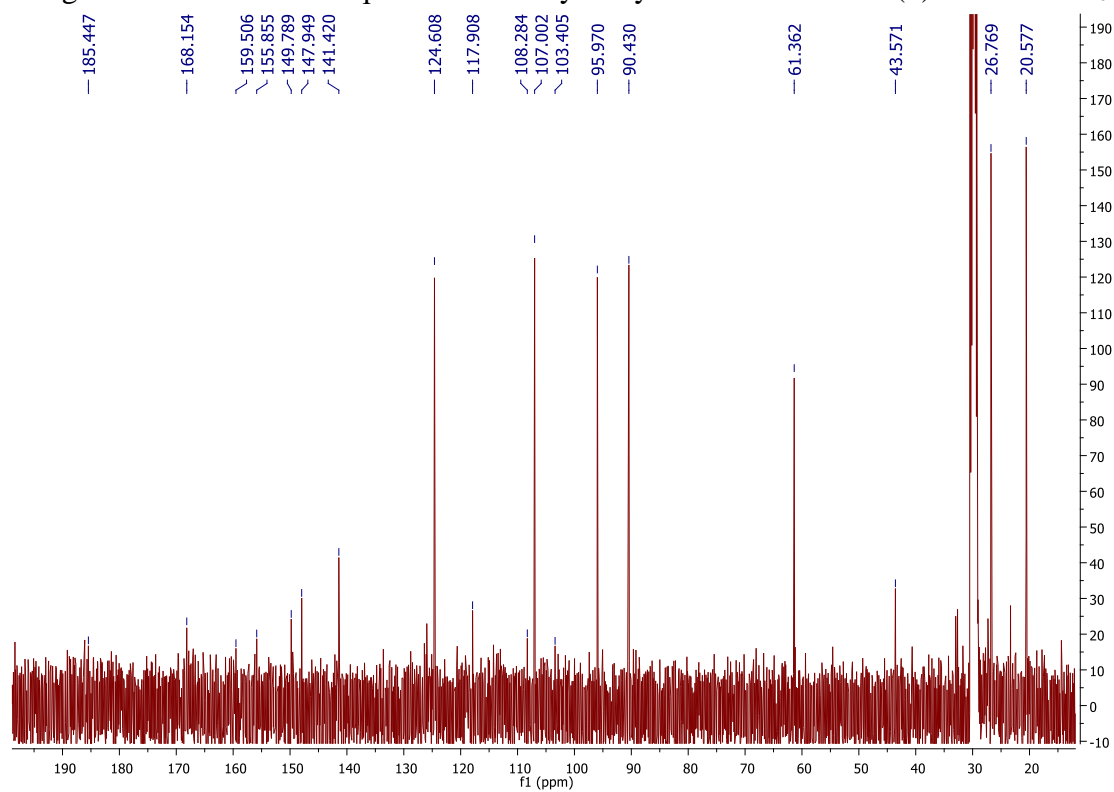

Figure S15. <sup>13</sup>C NMR spectrum of 3'-hydroxycalotherexanthone (**5**) in acetone-*d*<sub>6</sub>

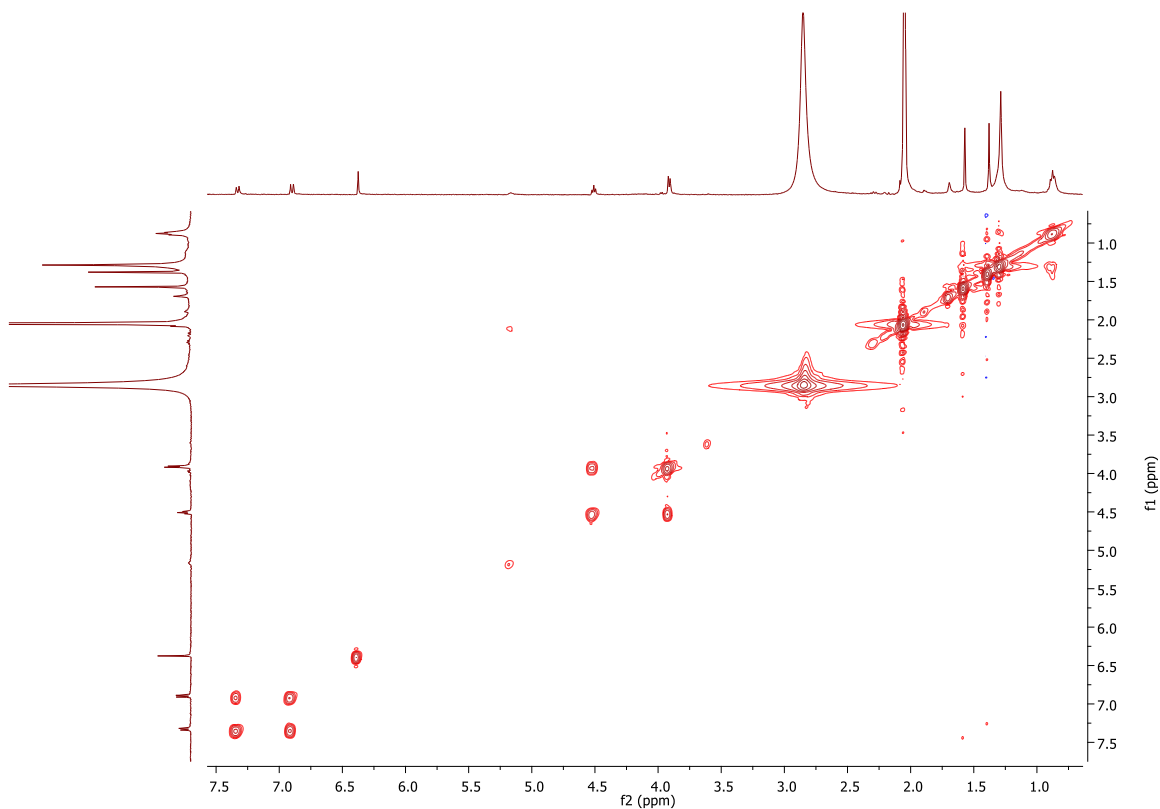

Figure S16. COSY spectrum of 3'-hydroxycalothrexanthone (**5**) in acetone- $d_6$

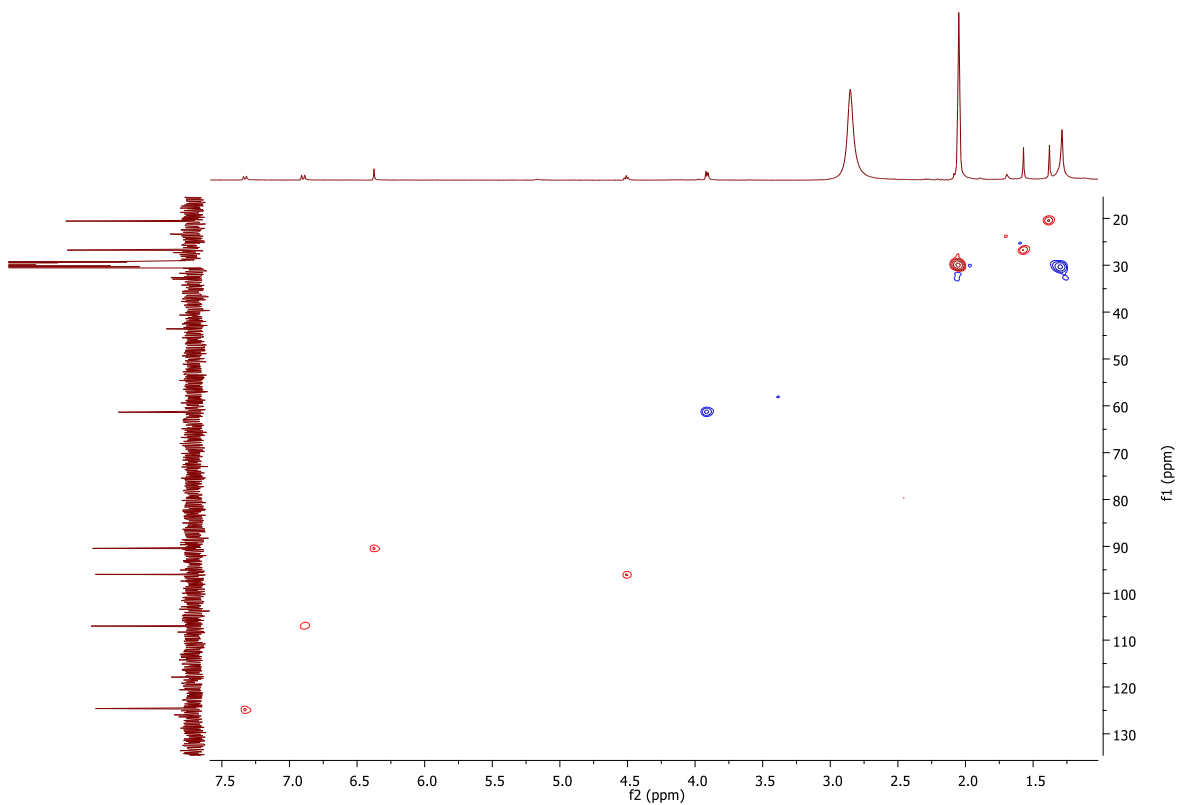

Figure S17. HSQC spectrum of 3'-hydroxycalothrexanthone (**5**) in acetone- $d_6$

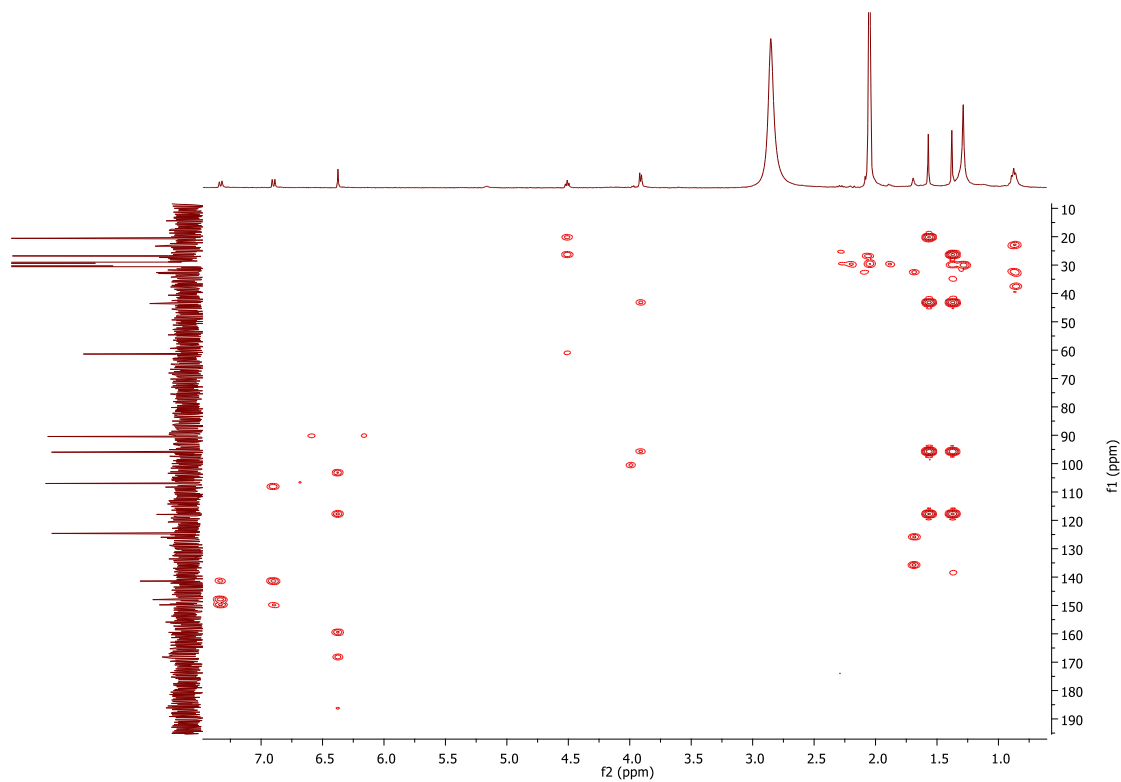

Figure S18. HMBC spectrum of 3'-hydroxycalothorexanthone (**5**) in acetone- $d_6$

Edvin\_21102019\_pn1 #1820 RT: 6.19 AV: 1 NL: 6.41E8  
T: FTMS + p ESI Full ms [110.0000-1650.0000]

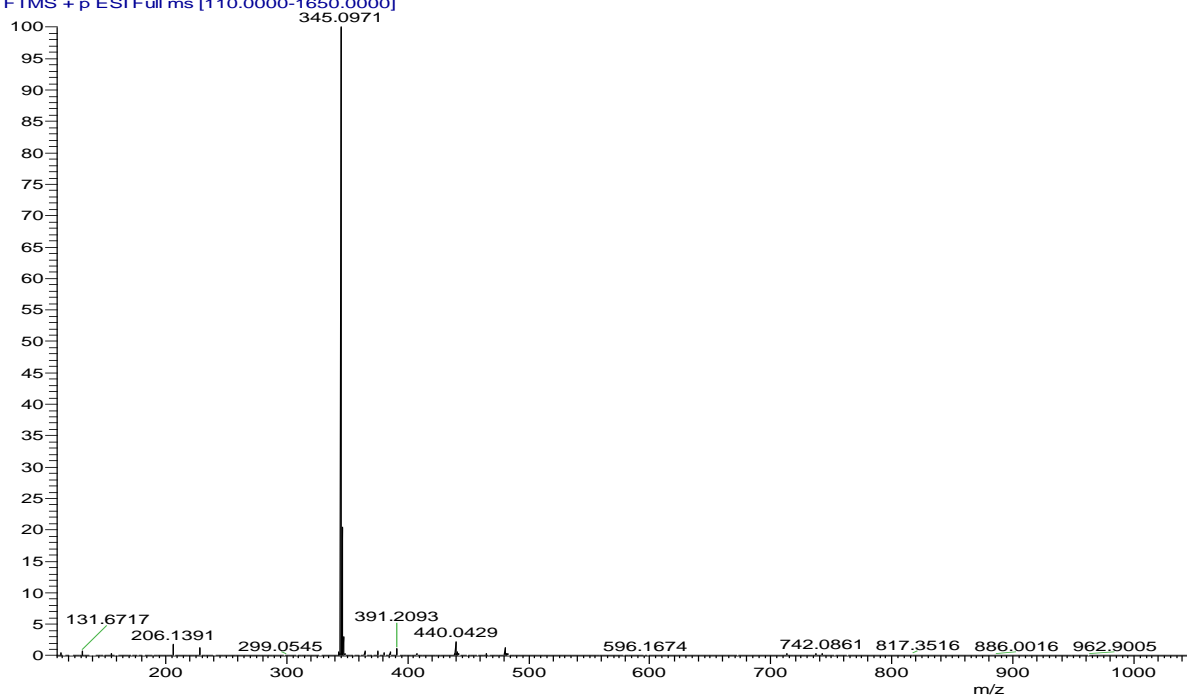

Figure S19. HRESIMS spectrum of 3'-hydroxycalothorexanthone (**5**) in MeOH

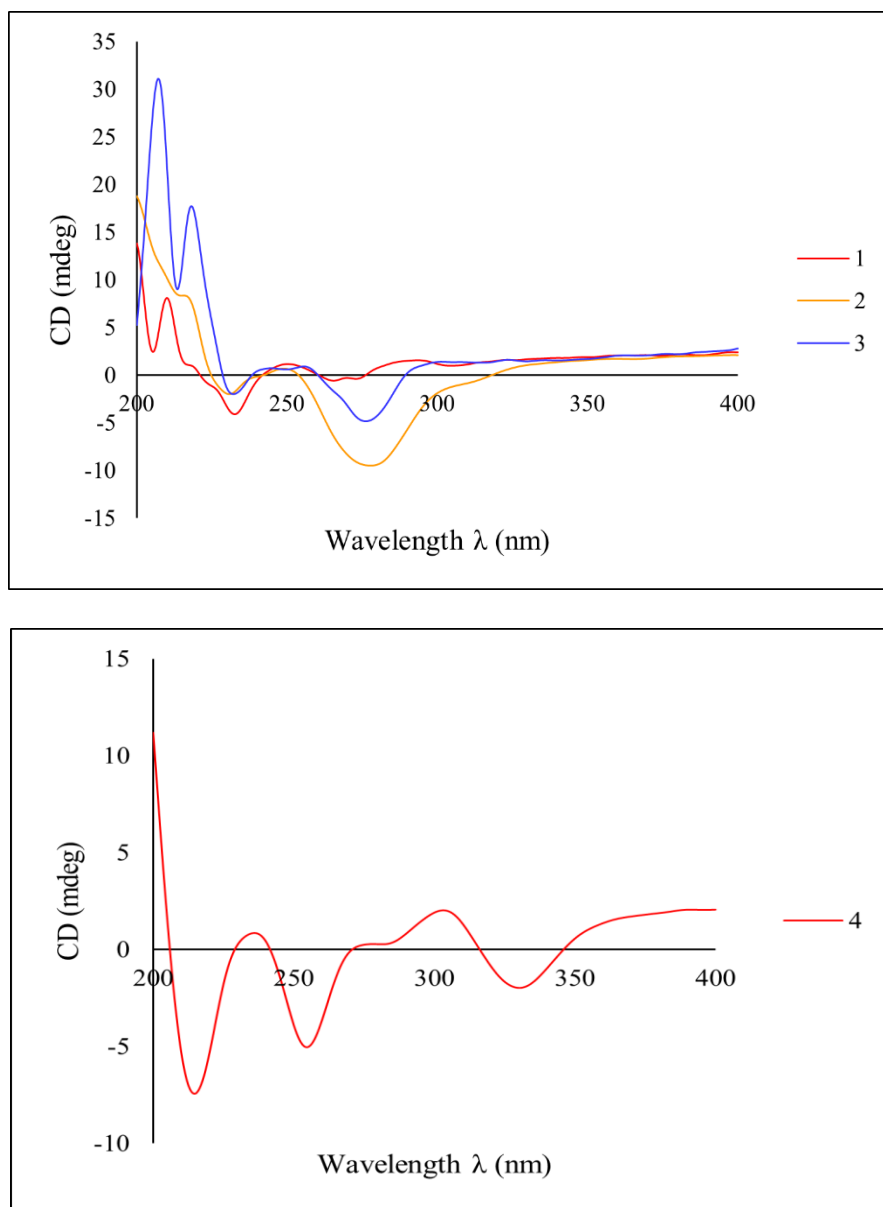

Figure S20. Experimental ECD spectra of **1–4** in MeOH
